# Supplementary material for: ADMETlab 3.0: an updated comprehensive online ADMET prediction platform enhanced with broader coverage, improved performance, API functionality and decision support
Source: PubMed Central journal article supplement — Nucleic Acids Res. 2024 Apr 4;52(W1):W422–31. doi: 10.1093/nar/gkae236 (PMC11223840; doi:10.1093/nar/gkae236), 2024-04-04
Supplement: gkae236_supplemental_file.pdf [file gkae236_supplemental_file.pdf]

## SUPPLEMENTARY DATA

### ADMETLAB 3.0: AN UPDATED COMPREHENSIVE ONLINE ADMET PREDICTION PLATFORM ENHANCED WITH BROADER COVERAGE, IMPROVED PERFORMANCE, API FUNCTIONALITY, AND DECISION SUPPORT

#### AUTHORS

Li Fu<sup>1,†</sup>, Shaohua Shi<sup>2,†</sup>, Jiakai Yi<sup>3,†</sup>, Ningning Wang<sup>4</sup>, Yuanhang He<sup>1</sup>, Zhenxing Wu<sup>5</sup>,  
Jinfu Peng<sup>1</sup>, Youchao Deng<sup>1</sup>, Wenxuan Wang<sup>1</sup>, Chenkun Wu<sup>3</sup>, Aiping Lyu<sup>2</sup>,  
Xiangxiang Zeng<sup>6</sup>, Wentao Zhao<sup>3</sup>, Tingjun Hou<sup>5,\*</sup> and Dongsheng Cao<sup>1,\*</sup>

<sup>1</sup> Xiangya School of Pharmaceutical Sciences, Central South University, Changsha, Hunan, 410013, P.R. China

<sup>2</sup> School of Chinese Medicine, Hong Kong Baptist University, Kowloon, Hong Kong SAR, 999077, P.R. China

<sup>3</sup> School of Computer Science, National University of Defense Technology, Changsha, Hunan, 410073, P.R. China

<sup>4</sup> Xiangya Hospital of Central South University, Changsha, Hunan, 410008, P.R. China

<sup>5</sup> College of Pharmaceutical Sciences, Zhejiang University, Hangzhou, Zhejiang, 310058, P.R. China

<sup>6</sup> Department of Computer Science, Hunan University, Changsha, Hunan, 410082, P.R. China

\* To whom correspondence should be addressed. Tel: +86-731-89824761; Email: oriental-cds@163.com

Correspondence may also be addressed to Tingjun Hou. Tel: +86-571-88208412; Email: tingjunhou@zju.edu.cn

† These authors contribute to this paper equally.

## Table of Contents

|                                                                                                                                                                                                                                                 |    |
|-------------------------------------------------------------------------------------------------------------------------------------------------------------------------------------------------------------------------------------------------|----|
| DMPNN framework.....                                                                                                                                                                                                                            | 3  |
| Uncertainty estimation method .....                                                                                                                                                                                                             | 5  |
| Regression model.....                                                                                                                                                                                                                           | 5  |
| Classification model.....                                                                                                                                                                                                                       | 6  |
| Supplementary Table 1. Data information of 77 predictive models .....                                                                                                                                                                           | 8  |
| Supplementary Table 2. Optimal hyperparameters for DMPNN models.....                                                                                                                                                                            | 10 |
| Supplementary Table 3. Optimal hyperparameters for DMPNN-Des models .....                                                                                                                                                                       | 11 |
| Supplementary Table 4. Predictive performance of regression models .....                                                                                                                                                                        | 12 |
| Supplementary Table 5. Predictive performance of classification models .....                                                                                                                                                                    | 14 |
| Supplementary Table 6. Regression model error at various uncertainty threshold...                                                                                                                                                               | 18 |
| Supplementary Table 7. The optimal uncertainty thresholds determined by maximum Yuden's index for various properties in classification model. ....                                                                                              | 19 |
| Supplementary Table 8. Runtime analysis in seconds for submissions of 1 to 1000 molecules for ADMETlab 2.0 and ADMETlab 3.0 with different modelling options. ...                                                                               | 20 |
| Supplementary Figure 1. Runtime analysis in seconds for submissions of 1 to 1000 molecules for ADMETlab 2.0, ADMETlab 3.0 (DMPNN-Des), ADMETlab 3.0 (DMPNN-Des & Uncertainty), ADMETlab 3.0 (DMPNN), and ADMETlab 3.0 (DMPN & Uncertainty)..... | 21 |
| References .....                                                                                                                                                                                                                                | 22 |

## DMPNN framework

Yang et al (1). introduced an open-source Python package called Chemprop designed for implementing DMPNN models. This package offers a robust and efficient solution tailored for molecular property prediction tasks and has garnered extensive utilization in fields such as drug discovery and materials science (2). Within the DMPNN framework, there exist two distinct stages: message passing and readout. Here, a graph  $G$  serves as an illustrative example, representing node (atom) features as  $x_v$  and edge (bond) features as  $e_{vw}$ . Initially, the edge hidden state  $h_{vw}^0$  is initialized using eq 1. This equation concatenate atom and bond features by passing them through the learned matrix  $W_l$  and applying the rectified linear unit (RELU) activation function. This initialization defines the edge hidden state, which undergoes subsequent updates during the message passing process. In eq 1,  $\tau$  represent the RELU activation function,  $W_l$  denotes a learned matrix, and  $cat()$  signifies a basic concatenation operation.

$$h_{vw}^0 = \tau(W_l cat(x_v, e_{vw})) \quad (1)$$

The first phase of message passing computes interactions between atom  $v$  and atom  $w$ . This is achieved by summing the hidden states of all bonds connected to atom  $v$  while excluding the hidden state of bonds from atom  $w$ , as described by  $m_{vw}^{t+1}$  in eq 2. This step captures information about the neighboring atoms and their connections to individual atoms within  $vw$ . In eq 2,  $h_{kv}^t \in R^D$  represents bond features at layer  $t \in \{1, 2, \dots, T\}$ ,  $k \in \{N(v) \setminus w\}$  denotes the set of nodes connected to  $v$  excluding  $w$ .

$$m_{vw}^{t+1} = \sum_{k \in \{N(v) \setminus w\}} h_{kv}^t \quad (2)$$

Following this, a new hidden message at depth 1 is created by summing the product of the initial hidden state and the learned matrix  $W_m$  with the message. This resultant output undergoes further processing using the activation function  $\tau$ , denoted as  $h_{vw}^{t+1}$  in eq 3.

$$h_{vw}^{t+1} = \tau(h_{vw}^0 + W_m m_{vw}^{t+1}) \quad (3)$$

In the final message passing layer (at  $t=T$ ), the updated hidden states  $h_{vw}^T$  are summed to create the ultimate message for each atom, as described in eq 4. This action aggregates information about all neighboring atoms and their relationships into the final message for each atom.

$$m_v = \sum_{w \in N(v)} h_{vw}^T \quad (4)$$

The hidden state  $h_v$  for each atom is derived by concatenating the initial atom features with the message vector, as indicated in eq 5.

$$h_v = \tau(W_i \text{cat}(x_v, m_v)) \quad (5)$$

Finally, employing eq 6, the hidden states  $h_v$  of each atom are summed to generate a molecular feature vector. This step aggregate information from all atoms in the molecule into a unified molecular feature vector, facilitating property prediction. It encompasses both structural and attribute information of the entire molecule, offering a comprehensive representation for further property prediction.

$$h = \sum_{v \in N(v)} h_v \quad (6)$$

In the DMPNN-Des model, preceding the readout phase, vector  $h$  is concatenated with descriptor vectors and collectively processed using a fully connected feedforward neural network to predict properties. The algorithm is implemented using the open-source Chemprop package (2). Regarding the raw datasets, we trained each dataset using Chemprop, employing random segmentation ratios [0.8, 0.1, 0.1] for training, testing, and evaluation. The batch process is iterated five times, and the average RMSE value and variance from these iterations are calculated to evaluate the robustness of the model.

## Uncertainty estimation method

In pharmaceutical research, especially in ADMET assessment, unreliable predictions might lead to misjudging drug efficacy, causing missed opportunities in drug development. Therefore, within AI-assisted drug development, quantifying predictive reliability is crucial for guiding subsequent research decisions by medicinal chemists (3).

### Regression model

Within the regression model, ADMETlab 3.0 employs the evidence-based deep learning technique proposed by Amini et al (4). Evidential deep learning extends the concept of learning probability distribution parameters, further predicting higher-order distributions of the original likelihood parameters themselves. These higher-order parameters define the evidence distribution, thereby capturing the model's predictions and the degree of evidence associated with those predictions. In contrast to Bayesian neural networks that set priors on neural network weights, the evidence learning approach estimates uncertainty by directly learning the parameters defining this evidence distribution. It encompasses both epistemic and aleatoric uncertainties, eliminating the need for sampling and thus obviating the necessity of sampling procedures.

In a regression setting, the training samples comprise  $D = \{x_i, y_i\}_{i=1}^N$ , where the target values  $y_i \in \mathbb{R}$  comprise an i.i.d. Gaussian distribution defined by mean and variance  $\theta = \{\mu, \sigma^2\}$ . Within the context of an evidential depth model, these parameters are presumed unknown and replaced by probabilistic estimates, achieved by placing a Gaussian distribution on the unknown mean  $\mu$  and an Inverse-Gamma prior on the unknown variance  $\sigma^2$ . We obtain a higher-order distribution (also termed the evidential distribution), depicted as  $p(\theta|m)$ , represented by a Normal Inverse-Gamma distribution. This evidential distribution is determined through four parameters,  $m = \{\gamma, \nu, \alpha, \beta\}$ . The model can capture predictive uncertainty by learning these parameters, as demonstrated in Figure 2. In this work, the uncertainty estimation of the regression model is achieved by setting the chemprop package(2) `uncertainty_method` to `evidential_total`.

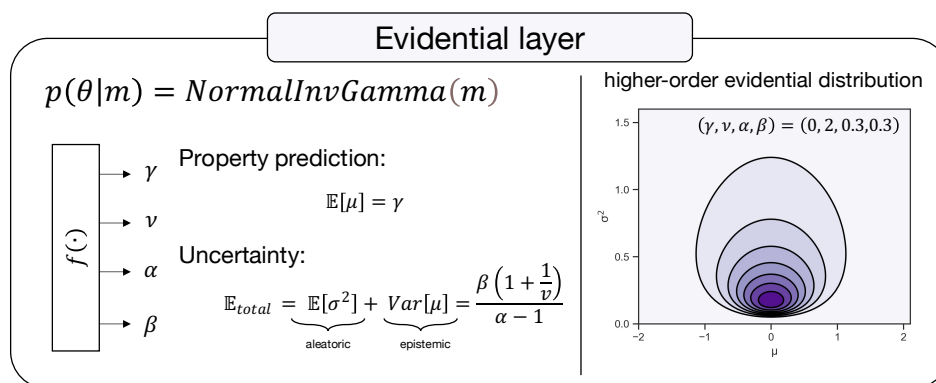

Moreover, to better assist users in assessing the reliability of model predictions based on model uncertainty, furthermore, we furnish the range of model RMSE within different uncertainty intervals. This aids users in assessing the reliability of model predictions based on varying levels of uncertainty.

### Classification model

In the classification model, uncertainty is estimated using the Monte Carlo dropout approach (5). This method considers dropout in deep neural networks as an approximate Bayesian inference of deep Gaussian processes. Specifically, the dropout technique involves applying dropout before each layer during training and maintaining dropout activation during the inference process. This allows for the generation of prediction distributions using different random masks, approximating the posterior of deep Gaussian processes. The variance of this distribution serves as an estimation of predictive uncertainty (6-8).

During experiments with uncertainty quantification, an ensemble of models generates a prediction distribution for each molecule using a dropout-enabled network with a sample size of 10. The probability of 0.1 to use for Monte Carlo dropout uncertainty estimation. Let  $y_t$  represent the prediction from a single model within the ensemble, which contains  $T = 10$  models. For a query sample  $x_i$ , the prediction  $\hat{y}$  is represented as the means of all predictions and the uncertainty of this sample  $U(x)$  can be provided by the variance  $\sigma_t^2$  of the prediction distribution.

$$U(x) = \sigma^2 = \frac{1}{T-1} \sum_{t=1}^T (y_t - \hat{y})^2 \quad (7)$$

We employed the method proposed by Dolezal et al (9). to determine the optimal uncertainty threshold value,  $\theta$ . This method establishes an uncertainty threshold, where predictions below this threshold are more likely to be correct than those with higher levels of uncertainty. To find the uncertainty threshold that optimally separates predictions into likely-correct (high-confidence) and likely-incorrect (low-confidence), we calculated the sensitivity and specificity for misprediction for all possible uncertainty thresholds. The corresponding Youden's index (J) for each uncertainty threshold  $\theta_i$  is the calculated as

$$J_i = Se_i + Sp_i - 1 \quad (8)$$

The optimal uncertainty threshold  $\theta$  is the defined as the threshold which maximized the Youden's index:

$$\theta = \operatorname{argmax}_i J_i \quad (9)$$

The single threshold is then used for all predicted made by the model. We take a binary a binary approach to confidence using the uncertainty threshold, with confidence of the classification model defined as

$$C(x) = \begin{cases} \text{high - confidence} & \sigma^2(x) < \theta \\ \text{low - confidence} & \sigma^2(x) \geq \theta \end{cases} \quad (10)$$

In other words, prediction uncertainty exceeding this value designates the model's prediction as low confidence, while prediction uncertainty below this threshold indicates high confidence in the model's prediction. This threshold will be used to assess the reliability of prediction in classification tasks within the ADMET models.

Supplementary Table 1. Data information of 77 predictive models

| Dataset                        | Total<br>(Positive/Negative) | Training set<br>(Positive/Negative) | Test set<br>(Positive/Negative) | Validation set<br>(Positive/Negative) |
|--------------------------------|------------------------------|-------------------------------------|---------------------------------|---------------------------------------|
| logS                           | 4797                         | 3837                                | 480                             | 480                                   |
| logD7.4                        | 19155                        | 15324                               | 1915                            | 1916                                  |
| logP                           | 12682                        | 10145                               | 1268                            | 1269                                  |
| melting point                  | 9384                         | 7507                                | 938                             | 939                                   |
| boiling point                  | 5758                         | 4606                                | 576                             | 576                                   |
| pKa (acidic)                   | 2750                         | 2200                                | 275                             | 275                                   |
| pKa (basic)                    | 2992                         | 2393                                | 299                             | 300                                   |
| Caco-2 Permeability            | 6502                         | 5201                                | 650                             | 651                                   |
| MDCK Permeability              | 1140                         | 912                                 | 114                             | 114                                   |
| Pgp inhibitor                  | 2209 (1315/894)              | 1767 (1052/715)                     | 220 (131/89)                    | 222 (132/90)                          |
| Pgp substrate                  | 1185 (586/599)               | 947 (468/479)                       | 119 (59/60)                     | 119 (59/60)                           |
| HIA                            | 1160 (1022/138)              | 927 (817/110)                       | 116 (102/14)                    | 117 (103/14)                          |
| F20%                           | 992 (753/239)                | 793 (602/191)                       | 99 (75/24)                      | 100 (76/24)                           |
| F30%                           | 992 (666/326)                | 792 (532/260)                       | 100 (67/33)                     | 100 (67/33)                           |
| F50%                           | 1474 (800/674)               | 1179 (640/539)                      | 147 (80/67)                     | 148 (80/68)                           |
| PAMPA                          | 2035 (651/1384)              | 1627 (520/1107)                     | 203 (65/138)                    | 205 (66/139)                          |
| BCRP inhibitor                 | 2799 (1098/1701)             | 2238 (878/1360)                     | 280 (110/170)                   | 281 (110/171)                         |
| MRP1 inhibitor                 | 1015 (636/379)               | 811 (508/303)                       | 102 (64/38)                     | 102 (64/38)                           |
| BSEP inhibitor                 | 763 (475/288)                | 610 (380/230)                       | 76 (47/29)                      | 77 (48/29)                            |
| OATP1B1 inhibitor              | 2372 (1343/1029)             | 1897 (1074/823)                     | 237 (134/103)                   | 238 (135/103)                         |
| OATP1B3 inhibitor              | 2228 (1540/688)              | 1782 (1232/550)                     | 223 (154/69)                    | 223 (154/69)                          |
| BBB                            | 2865 (1649/1216)             | 2291 (1319/972)                     | 287 (165/122)                   | 287 (165/122)                         |
| PPB                            | 4712                         | 3769                                | 471                             | 472                                   |
| VDss                           | 2440                         | 1952                                | 244                             | 244                                   |
| Fu                             | 2575                         | 2060                                | 257                             | 258                                   |
| CYP1A2 inhibitor               | 12614 (5872/6742)            | 10090 (4697/5393)                   | 1261 (587/674)                  | 1263 (588/675)                        |
| CYP1A2 substrate               | 366 (176/190)                | 292 (140/152)                       | 37 (18/19)                      | 37 (18/19)                            |
| CYP2C19 inhibitor              | 12611 (5770/6841)            | 10088 (4616/5472)                   | 1261 (577/684)                  | 1262 (577/685)                        |
| CYP2C19 substrate              | 256 (107/149)                | 204 (85/119)                        | 26 (11/15)                      | 26 (11/15)                            |
| CYP2C9 inhibitor               | 12089 (4014/8075)            | 9671 (3211/6460)                    | 1208 (401/807)                  | 1210 (402/808)                        |
| CYP2C9 substrate               | 811 (325/486)                | 648 (260/388)                       | 81 (32/49)                      | 82 (33/49)                            |
| CYP2D6 inhibitor               | 13073<br>(2535/10538)        | 10458 (2028/8430)                   | 1307 (253/1054)                 | 1308 (254/1054)                       |
| CYP2D6 substrate               | 877 (435/442)                | 701 (348/353)                       | 87 (43/44)                      | 89 (44/45)                            |
| CYP3A4 inhibitor               | 12339 (5092/7247)            | 9870 (4073/5797)                    | 1234 (509/725)                  | 1235 (510/725)                        |
| CYP3A4 substrate               | 979 (497/482)                | 782 (397/385)                       | 98 (50/48)                      | 99 (50/49)                            |
| CYP2B6 inhibitor               | 551 (197/354)                | 440 (157/283)                       | 55 (20/35)                      | 56 (20/36)                            |
| CYP2B6 substrate               | 2859 (260/2599)              | 2287 (208/2079)                     | 286 (26/260)                    | 286 (26/260)                          |
| CYP2C8 inhibitor               | 533 (312/221)                | 425 (249/176)                       | 53 (31/22)                      | 55 (32/23)                            |
| HLM Stability                  | 15521 (6071/9450)            | 12416 (4856/7560)                   | 1552 (607/945)                  | 1553 (608/945)                        |
| CL-plasma                      | 831                          | 664                                 | 83                              | 84                                    |
| T1/2                           | 3427                         | 2741                                | 343                             | 343                                   |
| hERG Blocker                   | 13845 (6922/6923)            | 11075 (5537/5538)                   | 1384 (692/692)                  | 1386 (693/693)                        |
| Human Hepatotoxicity           | 2304 (1299/1005)             | 1843 (1039/804)                     | 230 (130/100)                   | 231 (130/101)                         |
| DILI                           | 467 (235/232)                | 373 (188/185)                       | 46 (23/23)                      | 48 (24/24)                            |
| AMES Mutagenicity              | 7575 (4222/3353)             | 6059 (3377/2682)                    | 757 (422/335)                   | 759 (423/336)                         |
| ROA                            | 7327 (2799/4528)             | 5861 (2239/3622)                    | 733 (280/453)                   | 733 (280/453)                         |
| FDAMDD                         | 1197 (561/636)               | 956 (448/508)                       | 120 (56/64)                     | 121 (57/64)                           |
| Skin Sensitization             | 405 (274/131)                | 323 (219/104)                       | 40 (27/13)                      | 42 (28/14)                            |
| Carcinogenicity                | 1041 (516/525)               | 832 (412/420)                       | 104 (52/52)                     | 105 (52/53)                           |
| Eye Corrosion                  | 2298 (886/1412)              | 1837 (708/1129)                     | 230 (89/141)                    | 231 (89/142)                          |
| Eye Irritation                 | 5219 (3874/1345)             | 4175 (3099/1076)                    | 521 (387/134)                   | 523 (388/135)                         |
| Respiratory                    | 1388 (835/553)               | 1110 (668/442)                      | 138 (83/55)                     | 140 (84/56)                           |
| A549 Cytotoxicity              | 3302 (277/3025)              | 2641 (221/2420)                     | 330 (28/302)                    | 331 (28/303)                          |
| hERG Blocker 10um              | 9876 (5090/4786)             | 7900 (4072/3828)                    | 988 (509/479)                   | 988 (509/479)                         |
| Hematotoxicity                 | 2374 (752/1622)              | 1898 (601/1297)                     | 237 (75/162)                    | 239 (76/163)                          |
| Hek293 Cytotoxicity            | 6898 (1455/5443)             | 5518 (1164/4354)                    | 689 (145/544)                   | 691 (146/545)                         |
| Genotoxicity                   | 641 (264/377)                | 512 (211/301)                       | 64 (26/38)                      | 65 (27/38)                            |
| Drug-induced<br>Nephrotoxicity | 565 (287/278)                | 451 (229/222)                       | 57 (29/28)                      | 57 (29/28)                            |
| Drug-induced Neurotoxicity     | 684 (329/355)                | 547 (263/284)                       | 68 (33/35)                      | 69 (33/36)                            |
| Ototoxicity                    | 2808 (1103/1705)             | 2246 (882/1364)                     | 280 (110/170)                   | 282 (111/171)                         |
| RPMI-8226 Immunitoxicity       | 48811<br>(3877/44934)        | 39048<br>(3101/35947)               | 4881 (388/4493)                 | 4882 (388/4494)                       |



|               |                 |                 |              |              |
|---------------|-----------------|-----------------|--------------|--------------|
| BCF           | 676             | 540             | 68           | 68           |
| IGC50         | 1787            | 1429            | 179          | 179          |
| LC50FM        | 816             | 652             | 82           | 82           |
| LC50DM        | 347             | 277             | 35           | 35           |
| NR-AR         | 7312 (266/7046) | 5848 (212/5636) | 732 (27/705) | 732 (27/705) |
| NR-AR-LBD     | 6862 (233/6629) | 5489 (186/5303) | 686 (23/663) | 687 (24/663) |
| NR-AhR        | 6603 (763/5840) | 5282 (610/4672) | 660 (76/584) | 661 (77/584) |
| NR-Aromatase  | 5887 (256/5631) | 4708 (204/4504) | 589 (26/563) | 590 (26/564) |
| NR-ER         | 6166 (669/5497) | 4932 (535/4397) | 617 (67/550) | 617 (67/550) |
| NR-ER-LBD     | 7052 (342/6710) | 5641 (273/5368) | 705 (34/671) | 706 (35/671) |
| NR-PPAR-gamma | 6586 (197/6389) | 5268 (157/5111) | 659 (20/639) | 659 (20/639) |
| SR-ARE        | 5652 (865/4787) | 4521 (692/3829) | 565 (86/479) | 566 (87/479) |
| SR-ATAD5      | 7170 (249/6921) | 5735 (199/5536) | 717 (25/692) | 718 (25/693) |
| SR-HSE        | 6319 (360/5959) | 5055 (288/4767) | 632 (36/596) | 632 (36/596) |
| SR-MMP        | 5913 (892/5021) | 4729 (713/4016) | 591 (89/502) | 593 (90/503) |
| SR-p53        | 6915 (456/6459) | 5531 (364/5167) | 692 (46/646) | 692 (46/646) |

Supplementary Table 2. Optimal hyperparameters for DMPNN models

| Hyperparameter  | Regression |              |           |      |          | Classification |            |       |          |
|-----------------|------------|--------------|-----------|------|----------|----------------|------------|-------|----------|
|                 | Absorption | Distribution | Excretion | PCP  | Toxicity | Absorption     | Metabolism | Tox21 | Toxicity |
| depth           | 2          | 5            | 4         | 3    | 4        | 2              | 4          | 4     | 6        |
| dropout         | 0.1        | 0.1          | 0.1       | 0.15 | 0.05     | 0.4            | 0.3        | 0     | 0.35     |
| ffn_hidden_size | 1900       | 1300         | 1900      | 2200 | 1200     | 1900           | 1900       | 1300  | 2300     |
| ffn_num_layers  | 3          | 3            | 3         | 3    | 3        | 3              | 3          | 3     | 1        |
| hidden_size     | 900        | 1200         | 1100      | 900  | 1100     | 1900           | 900        | 600   | 1400     |
| batch_size      | 128        | 128          | 128       | 128  | 128      | 128            | 128        | 128   | 128      |
| epochs          | 200        | 200          | 200       | 200  | 200      | 200            | 200        | 200   | 200      |

Supplementary Table 3. Optimal hyperparameters for DMPNN-Des models

| Hyperparameter  | Regression |              |           |      |          | Cassification |            |       |          |
|-----------------|------------|--------------|-----------|------|----------|---------------|------------|-------|----------|
|                 | Absorption | Distribution | Excretion | PCP  | Toxicity | Absorption    | Metabolism | Tox21 | Toxicity |
| depth           | 5          | 5            | 4         | 4    | 4        | 4             | 5          | 6     | 4        |
| dropout         | 0.25       | 0.3          | 0.3       | 0.1  | 0.15     | 0.05          | 0.15       | 0.25  | 0.3      |
| ffn_hidden_size | 800        | 800          | 300       | 2000 | 300      | 1400          | 400        | 400   | 1900     |
| ffn_num_layers  | 1          | 3            | 1         | 3    | 3        | 1             | 3          | 3     | 2        |
| hidden_size     | 2000       | 2000         | 1100      | 1000 | 2400     | 1200          | 600        | 1200  | 800      |
| batch_size      | 128        | 128          | 128       | 128  | 128      | 128           | 128        | 128   | 128      |
| epochs          | 200        | 200          | 200       | 200  | 200      | 200           | 200        | 200   | 200      |

Supplementary Table 4. Predictive performance of regression models

| Dataset                 | Subset         | DMPNN-Des      |              |              | DMPNN          |              |              | MGA            |              |              |
|-------------------------|----------------|----------------|--------------|--------------|----------------|--------------|--------------|----------------|--------------|--------------|
|                         |                | R <sup>2</sup> | RMSE         | MAE          | R <sup>2</sup> | RMSE         | MAE          | R <sup>2</sup> | RMSE         | MAE          |
| logS                    | Test set       | 0.877±0.013    | 0.746±0.027  | 0.495±0.010  | 0.869±0.010    | 0.773±0.018  | 0.516±0.006  | 0.764±0.026    | 1.034±0.042  | 0.775±0.042  |
|                         | Validation set | 0.885±0.011    | 0.740±0.028  | 0.501±0.015  | 0.880±0.009    | 0.758±0.024  | 0.515±0.011  | 0.772±0.026    | 1.042±0.054  | 0.793±0.039  |
| logD7.4                 | Test set       | 0.902±0.004    | 0.398±0.008  | 0.290±0.006  | 0.894±0.003    | 0.414±0.006  | 0.305±0.005  | 0.579±0.021    | 0.822±0.016  | 0.649±0.014  |
|                         | Validation set | 0.896±0.006    | 0.404±0.011  | 0.297±0.009  | 0.889±0.005    | 0.417±0.011  | 0.311±0.011  | 0.554±0.018    | 0.837±0.019  | 0.661±0.016  |
| logP                    | Test set       | 0.958±0.003    | 0.378±0.017  | 0.253±0.009  | 0.956±0.004    | 0.385±0.018  | 0.263±0.011  | 0.780±0.016    | 0.861±0.026  | 0.662±0.019  |
|                         | Validation set | 0.959±0.005    | 0.375±0.018  | 0.257±0.007  | 0.956±0.005    | 0.388±0.016  | 0.266±0.004  | 0.783±0.014    | 0.861±0.020  | 0.665±0.018  |
| melting point           | Test set       | 0.862±0.009    | 37.423±1.466 | 26.646±0.925 | 0.852±0.009    | 38.741±1.441 | 27.709±0.832 | 0.859±0.028    | 37.658±3.978 | 27.45±2.896  |
|                         | Validation set | 0.861±0.012    | 36.868±1.748 | 26.236±0.968 | 0.847±0.010    | 38.692±1.356 | 27.884±0.989 | 0.854±0.033    | 37.540±4.725 | 27.421±3.41  |
| boiling point           | Test set       | 0.940±0.012    | 20.360±2.230 | 12.099±1.393 | 0.926±0.011    | 22.607±2.036 | 14.522±1.242 | 0.900±0.053    | 25.644±7.215 | 15.543±2.113 |
|                         | Validation set | 0.942±0.009    | 20.874±1.321 | 12.548±0.56  | 0.929±0.008    | 23.112±0.964 | 14.65±0.560  | 0.932±0.019    | 22.478±2.938 | 15.637±1.91  |
| pKa (acidic)            | Test set       | 0.880±0.013    | 1.164±0.068  | 0.737±0.065  | 0.880±0.008    | 1.163±0.040  | 0.737±0.027  | 0.649±0.036    | 1.990±0.080  | 1.437±0.071  |
|                         | Validation set | 0.892±0.013    | 1.102±0.068  | 0.698±0.019  | 0.886±0.012    | 1.131±0.079  | 0.721±0.062  | 0.645±0.036    | 1.999±0.143  | 1.431±0.094  |
| pKa (basic)             | Test set       | 0.872±0.026    | 1.142±0.118  | 0.707±0.055  | 0.868±0.013    | 1.164±0.073  | 0.749±0.031  | 0.689±0.037    | 1.785±0.129  | 1.328±0.050  |
|                         | Validation set | 0.870±0.024    | 1.163±0.138  | 0.715±0.067  | 0.870±0.030    | 1.158±0.147  | 0.744±0.072  | 0.702±0.023    | 1.764±0.146  | 1.294±0.102  |
| Caco-2 Permeability     | Test set       | 0.743±0.018    | 0.325±0.013  | 0.242±0.011  | 0.742±0.020    | 0.325±0.007  | 0.241±0.005  | 0.652±0.023    | 0.378±0.009  | 0.293±0.004  |
|                         | Validation set | 0.758±0.015    | 0.314±0.011  | 0.236±0.009  | 0.752±0.014    | 0.317±0.004  | 0.234±0.003  | 0.691±0.028    | 0.354±0.012  | 0.276±0.008  |
| MDCK Permeability       | Test set       | 0.700±0.062    | 0.293±0.034  | 0.205±0.010  | 0.695±0.058    | 0.296±0.035  | 0.203±0.008  | 0.629±0.074    | 0.327±0.043  | 0.237±0.019  |
|                         | Validation set | 0.693±0.070    | 0.297±0.050  | 0.196±0.022  | 0.677±0.074    | 0.304±0.053  | 0.197±0.023  | 0.580±0.101    | 0.346±0.054  | 0.245±0.020  |
| PPB                     | Test set       | 0.824±0.031    | 11.382±0.648 | 5.976±0.429  | 0.788±0.056    | 12.439±1.182 | 6.594±0.668  | 0.705±0.054    | 14.771±0.715 | 9.041±0.538  |
|                         | Validation set | 0.820±0.035    | 11.508±0.880 | 6.151±0.489  | 0.804±0.029    | 12.049±0.774 | 6.523±0.488  | 0.746±0.045    | 13.684±0.664 | 8.662±0.405  |
| VDss                    | Test set       | 0.760±0.045    | 0.301±0.024  | 0.162±0.010  | 0.742±0.050    | 0.312±0.026  | 0.173±0.016  | 0.581±0.032    | 0.399±0.009  | 0.298±0.008  |
|                         | Validation set | 0.813±0.040    | 0.260±0.029  | 0.143±0.018  | 0.811±0.042    | 0.261±0.028  | 0.153±0.020  | 0.594±0.030    | 0.385±0.014  | 0.295±0.013  |
| Fu                      | Test set       | 0.894±0.024    | 0.229±0.027  | 0.135±0.012  | 0.879±0.027    | 0.244±0.029  | 0.149±0.020  | 0.695±0.041    | 0.390±0.018  | 0.289±0.017  |
|                         | Validation set | 0.885±0.017    | 0.250±0.024  | 0.148±0.008  | 0.885±0.015    | 0.250±0.017  | 0.153±0.010  | 0.731±0.015    | 0.383±0.017  | 0.287±0.012  |
| CL-plasma               | Test set       | 0.667±0.046    | 2.912±0.311  | 1.783±0.160  | 0.635±0.070    | 3.053±0.441  | 2.006±0.285  | 0.627±0.165    | 2.957±0.353  | 2.060±0.273  |
|                         | Validation set | 0.655±0.106    | 3.028±0.371  | 1.817±0.211  | 0.587±0.108    | 3.323±0.360  | 2.150±0.245  | 0.662±0.081    | 2.744±0.283  | 1.924±0.221  |
| T1/2                    | Test set       | 0.653±0.070    | 0.877±0.111  | 0.420±0.026  | 0.629±0.110    | 0.900±0.141  | 0.449±0.037  | 0.638±0.147    | 1.013±0.200  | 0.535±0.064  |
|                         | Validation set | 0.748±0.052    | 0.965±0.143  | 0.455±0.012  | 0.740±0.071    | 0.983±0.171  | 0.464±0.027  | 0.745±0.149    | 0.919±0.152  | 0.522±0.044  |
| Bioconcentration Factor | Test set       | 0.822±0.073    | 0.566±0.108  | 0.430±0.071  | 0.837±0.054    | 0.546±0.086  | 0.418±0.055  | 0.746±0.074    | 0.674±0.107  | 0.504±0.069  |
|                         | Validation set | 0.786±0.047    | 0.608±0.042  | 0.454±0.029  | 0.749±0.074    | 0.655±0.065  | 0.475±0.041  | 0.793±0.071    | 0.630±0.112  | 0.467±0.064  |
| IGC50                   | Test set       | 0.862±0.016    | 0.382±0.018  | 0.273±0.013  | 0.856±0.020    | 0.391±0.032  | 0.281±0.023  | 0.792±0.029    | 0.468±0.029  | 0.348±0.018  |
|                         | Validation set | 0.890±0.026    | 0.350±0.041  | 0.249±0.027  | 0.884±0.018    | 0.363±0.033  | 0.262±0.017  | 0.832±0.033    | 0.439±0.017  | 0.334±0.014  |
| LC50FM                  | Test set       | 0.686±0.053    | 0.909±0.125  | 0.669±0.070  | 0.634±0.068    | 0.986±0.174  | 0.727±0.116  | 0.587±0.201    | 0.998±0.133  | 0.685±0.052  |
|                         | Validation set | 0.702±0.120    | 0.968±0.186  | 0.665±0.094  | 0.628±0.169    | 1.075±0.214  | 0.730±0.129  | 0.747±0.099    | 0.738±0.081  | 0.543±0.040  |
| LC50DM                  | Test set       | 0.727±0.073    | 0.747±0.048  | 0.503±0.041  | 0.695±0.123    | 0.778±0.098  | 0.526±0.046  | 0.699±0.064    | 0.805±0.086  | 0.580±0.030  |

---

Validation set 0.751±0.061 0.742±0.083 0.497±0.047 0.748±0.066 0.747±0.089 0.506±0.056 0.692±0.083 0.804±0.120 0.591±0.082

Supplementary Table 5. Predictive performance of classification models

| Dataset           | Subset         | DMPNN-Des   |             |             | DMPNN       |             |             | MGA         |             |             |
|-------------------|----------------|-------------|-------------|-------------|-------------|-------------|-------------|-------------|-------------|-------------|
|                   |                | AUC         | ACC         | MCC         | AUC         | ACC         | MCC         | AUC         | ACC         | MCC         |
| Pgp-inhibitor     | Test set       | 0.915±0.011 | 0.850±0.010 | 0.687±0.021 | 0.896±0.015 | 0.833±0.007 | 0.652±0.014 | 0.915±0.014 | 0.838±0.016 | 0.662±0.033 |
|                   | Validation set | 0.908±0.007 | 0.841±0.029 | 0.670±0.063 | 0.895±0.008 | 0.827±0.019 | 0.641±0.041 | 0.928±0.015 | 0.867±0.017 | 0.724±0.036 |
| Pgp-substrate     | Test set       | 0.892±0.019 | 0.815±0.034 | 0.634±0.068 | 0.894±0.010 | 0.829±0.022 | 0.661±0.041 | 0.890±0.022 | 0.807±0.035 | 0.616±0.071 |
|                   | Validation set | 0.900±0.021 | 0.831±0.021 | 0.665±0.042 | 0.896±0.022 | 0.821±0.019 | 0.645±0.037 | 0.898±0.031 | 0.805±0.039 | 0.610±0.079 |
| HIA               | Test set       | 0.897±0.054 | 0.911±0.018 | 0.571±0.090 | 0.891±0.037 | 0.894±0.027 | 0.508±0.133 | 0.901±0.067 | 0.877±0.032 | 0.548±0.114 |
|                   | Validation set | 0.933±0.038 | 0.927±0.022 | 0.646±0.133 | 0.929±0.046 | 0.931±0.016 | 0.685±0.084 | 0.921±0.051 | 0.898±0.036 | 0.629±0.105 |
| F20%              | Test set       | 0.909±0.047 | 0.857±0.030 | 0.616±0.087 | 0.907±0.024 | 0.855±0.034 | 0.579±0.101 | 0.818±0.036 | 0.757±0.051 | 0.404±0.094 |
|                   | Validation set | 0.919±0.027 | 0.875±0.032 | 0.668±0.086 | 0.909±0.023 | 0.853±0.030 | 0.616±0.071 | 0.799±0.066 | 0.774±0.050 | 0.461±0.133 |
| F30%              | Test set       | 0.919±0.026 | 0.851±0.040 | 0.666±0.094 | 0.915±0.030 | 0.853±0.031 | 0.666±0.069 | 0.785±0.070 | 0.694±0.085 | 0.356±0.153 |
|                   | Validation set | 0.911±0.035 | 0.869±0.034 | 0.701±0.078 | 0.911±0.025 | 0.853±0.025 | 0.668±0.060 | 0.818±0.072 | 0.753±0.040 | 0.457±0.105 |
| F50%              | Test set       | 0.791±0.025 | 0.716±0.033 | 0.432±0.063 | 0.760±0.031 | 0.705±0.035 | 0.413±0.062 | 0.762±0.012 | 0.703±0.021 | 0.409±0.043 |
|                   | Validation set | 0.804±0.020 | 0.715±0.015 | 0.429±0.029 | 0.787±0.017 | 0.704±0.021 | 0.416±0.057 | 0.753±0.042 | 0.679±0.036 | 0.360±0.074 |
| PAMPA             | Test set       | 0.731±0.017 | 0.735±0.024 | 0.364±0.055 | 0.717±0.023 | 0.718±0.028 | 0.316±0.071 | 0.771±0.029 | 0.729±0.017 | 0.411±0.035 |
|                   | Validation set | 0.761±0.018 | 0.741±0.015 | 0.384±0.028 | 0.745±0.027 | 0.735±0.013 | 0.363±0.046 | 0.784±0.019 | 0.748±0.013 | 0.443±0.039 |
| BCRP inhibitor    | Test set       | 0.949±0.015 | 0.892±0.013 | 0.777±0.030 | 0.942±0.008 | 0.870±0.007 | 0.731±0.016 | 0.938±0.022 | 0.864±0.027 | 0.725±0.053 |
|                   | Validation set | 0.948±0.012 | 0.891±0.011 | 0.775±0.025 | 0.946±0.016 | 0.882±0.022 | 0.760±0.042 | 0.940±0.012 | 0.862±0.036 | 0.727±0.067 |
| MRP1 inhibitor    | Test set       | 0.956±0.023 | 0.928±0.019 | 0.846±0.042 | 0.953±0.021 | 0.924±0.014 | 0.839±0.027 | 0.946±0.021 | 0.876±0.015 | 0.750±0.025 |
|                   | Validation set | 0.971±0.008 | 0.938±0.017 | 0.869±0.036 | 0.974±0.009 | 0.944±0.007 | 0.883±0.016 | 0.950±0.021 | 0.844±0.021 | 0.692±0.044 |
| OATP1B1inhibitor  | Test set       | 0.826±0.034 | 0.760±0.044 | 0.517±0.083 | 0.812±0.034 | 0.755±0.030 | 0.500±0.062 | 0.720±0.024 | 0.660±0.025 | 0.318±0.046 |
|                   | Validation set | 0.850±0.024 | 0.783±0.016 | 0.561±0.037 | 0.829±0.012 | 0.770±0.019 | 0.530±0.040 | 0.706±0.042 | 0.664±0.040 | 0.327±0.080 |
| OATP1B3 inhibitor | Test set       | 0.882±0.022 | 0.833±0.025 | 0.614±0.058 | 0.878±0.020 | 0.832±0.017 | 0.607±0.037 | 0.744±0.045 | 0.665±0.033 | 0.350±0.048 |
|                   | Validation set | 0.884±0.019 | 0.846±0.031 | 0.647±0.057 | 0.874±0.019 | 0.844±0.012 | 0.631±0.028 | 0.725±0.031 | 0.669±0.041 | 0.325±0.077 |
| BSEP inhibitor    | Test set       | 0.940±0.013 | 0.883±0.023 | 0.747±0.050 | 0.918±0.026 | 0.856±0.018 | 0.692±0.042 | 0.922±0.028 | 0.864±0.047 | 0.715±0.094 |
|                   | Validation set | 0.935±0.028 | 0.874±0.038 | 0.733±0.080 | 0.909±0.055 | 0.844±0.045 | 0.667±0.101 | 0.948±0.018 | 0.905±0.041 | 0.799±0.089 |
| BBB Penetration   | Test set       | 0.908±0.004 | 0.836±0.014 | 0.666±0.030 | 0.892±0.019 | 0.817±0.019 | 0.626±0.041 | 0.889±0.013 | 0.817±0.019 | 0.624±0.040 |
|                   | Validation set | 0.905±0.018 | 0.844±0.014 | 0.680±0.031 | 0.888±0.009 | 0.824±0.008 | 0.642±0.018 | 0.905±0.017 | 0.826±0.011 | 0.643±0.023 |
| CYP1A2 inhibitor  | Test set       | 0.942±0.003 | 0.874±0.003 | 0.748±0.006 | 0.926±0.005 | 0.858±0.006 | 0.715±0.012 | 0.931±0.005 | 0.847±0.008 | 0.695±0.016 |
|                   | Validation set | 0.935±0.003 | 0.864±0.005 | 0.729±0.010 | 0.917±0.002 | 0.851±0.009 | 0.701±0.018 | 0.929±0.005 | 0.851±0.006 | 0.702±0.013 |
| CYP1A2 substrate  | Test set       | 0.806±0.062 | 0.739±0.092 | 0.480±0.191 | 0.824±0.063 | 0.717±0.059 | 0.455±0.121 | 0.767±0.059 | 0.683±0.042 | 0.379±0.078 |
|                   | Validation set | 0.850±0.012 | 0.779±0.032 | 0.562±0.061 | 0.863±0.015 | 0.795±0.031 | 0.593±0.061 | 0.833±0.062 | 0.790±0.056 | 0.585±0.115 |
| CYP2C19 inhibitor | Test set       | 0.915±0.005 | 0.843±0.009 | 0.689±0.016 | 0.902±0.005 | 0.831±0.008 | 0.660±0.018 | 0.899±0.006 | 0.824±0.017 | 0.655±0.028 |
|                   | Validation set | 0.921±0.011 | 0.846±0.017 | 0.698±0.032 | 0.906±0.008 | 0.839±0.010 | 0.677±0.019 | 0.910±0.008 | 0.831±0.011 | 0.669±0.020 |
| CYP2C19 substrate | Test set       | 0.884±0.030 | 0.797±0.033 | 0.583±0.066 | 0.850±0.049 | 0.822±0.073 | 0.636±0.154 | 0.841±0.056 | 0.773±0.077 | 0.552±0.127 |
|                   | Validation set | 0.829±0.115 | 0.778±0.104 | 0.551±0.220 | 0.796±0.081 | 0.713±0.107 | 0.421±0.221 | 0.798±0.092 | 0.698±0.078 | 0.394±0.153 |
| CYP2C9 inhibitor  | Test set       | 0.917±0.009 | 0.854±0.009 | 0.682±0.020 | 0.902±0.009 | 0.844±0.012 | 0.652±0.023 | 0.902±0.008 | 0.816±0.014 | 0.632±0.023 |
|                   | Validation set | 0.921±0.008 | 0.853±0.009 | 0.685±0.016 | 0.907±0.008 | 0.843±0.012 | 0.651±0.025 | 0.899±0.006 | 0.808±0.008 | 0.621±0.017 |

|                      |                |             |             |             |             |             |             |             |             |             |
|----------------------|----------------|-------------|-------------|-------------|-------------|-------------|-------------|-------------|-------------|-------------|
| CYP2C9 substrate     | Test set       | 0.782±0.042 | 0.720±0.049 | 0.433±0.100 | 0.777±0.009 | 0.700±0.026 | 0.384±0.040 | 0.728±0.039 | 0.678±0.056 | 0.372±0.099 |
|                      | Validation set | 0.783±0.025 | 0.730±0.044 | 0.438±0.092 | 0.808±0.045 | 0.754±0.055 | 0.489±0.117 | 0.744±0.051 | 0.646±0.047 | 0.315±0.068 |
| CYP2D6 inhibitor     | Test set       | 0.886±0.010 | 0.869±0.012 | 0.575±0.033 | 0.870±0.009 | 0.868±0.010 | 0.572±0.024 | 0.891±0.005 | 0.796±0.023 | 0.512±0.035 |
|                      | Validation set | 0.898±0.010 | 0.880±0.006 | 0.608±0.016 | 0.875±0.013 | 0.865±0.007 | 0.564±0.019 | 0.889±0.005 | 0.801±0.021 | 0.521±0.035 |
| CYP2D6 substrate     | Test set       | 0.844±0.057 | 0.754±0.051 | 0.514±0.099 | 0.802±0.043 | 0.752±0.035 | 0.505±0.068 | 0.811±0.053 | 0.736±0.036 | 0.478±0.079 |
|                      | Validation set | 0.836±0.027 | 0.766±0.033 | 0.539±0.063 | 0.801±0.017 | 0.751±0.017 | 0.502±0.034 | 0.790±0.028 | 0.726±0.033 | 0.456±0.066 |
| CYP3A4 inhibitor     | Test set       | 0.916±0.005 | 0.834±0.009 | 0.667±0.020 | 0.887±0.007 | 0.813±0.008 | 0.615±0.018 | 0.908±0.013 | 0.821±0.020 | 0.647±0.037 |
|                      | Validation set | 0.913±0.007 | 0.835±0.011 | 0.666±0.020 | 0.892±0.007 | 0.816±0.006 | 0.622±0.012 | 0.905±0.006 | 0.814±0.010 | 0.632±0.014 |
| CYP3A4 substrate     | Test set       | 0.798±0.034 | 0.720±0.012 | 0.444±0.027 | 0.764±0.043 | 0.715±0.032 | 0.434±0.065 | 0.817±0.031 | 0.749±0.051 | 0.500±0.103 |
|                      | Validation set | 0.836±0.028 | 0.760±0.030 | 0.525±0.060 | 0.820±0.027 | 0.740±0.036 | 0.481±0.073 | 0.835±0.020 | 0.758±0.011 | 0.518±0.023 |
| CYP2B6 inhibitor     | Test set       | 0.808±0.061 | 0.770±0.030 | 0.505±0.063 | 0.821±0.024 | 0.741±0.029 | 0.434±0.055 | 0.806±0.109 | 0.733±0.118 | 0.462±0.219 |
|                      | Validation set | 0.859±0.038 | 0.782±0.039 | 0.540±0.100 | 0.865±0.055 | 0.786±0.042 | 0.544±0.093 | 0.839±0.047 | 0.768±0.046 | 0.530±0.094 |
| CYP2B6 substrate     | Test set       | 0.927±0.013 | 0.947±0.010 | 0.679±0.071 | 0.950±0.013 | 0.950±0.011 | 0.688±0.074 | 0.914±0.022 | 0.884±0.034 | 0.529±0.099 |
|                      | Validation set | 0.909±0.024 | 0.945±0.010 | 0.638±0.053 | 0.889±0.018 | 0.934±0.012 | 0.568±0.079 | 0.892±0.021 | 0.878±0.034 | 0.470±0.051 |
| CYP2C8 inhibitor     | Test set       | 0.918±0.032 | 0.823±0.064 | 0.637±0.132 | 0.918±0.026 | 0.838±0.039 | 0.666±0.081 | 0.888±0.034 | 0.811±0.044 | 0.617±0.088 |
|                      | Validation set | 0.932±0.032 | 0.862±0.034 | 0.717±0.072 | 0.911±0.038 | 0.851±0.042 | 0.697±0.086 | 0.931±0.034 | 0.833±0.039 | 0.667±0.080 |
| HLM Stability        | Test set       | 0.882±0.007 | 0.808±0.009 | 0.609±0.019 | 0.877±0.006 | 0.803±0.004 | 0.592±0.008 | 0.830±0.013 | 0.731±0.009 | 0.478±0.022 |
|                      | Validation set | 0.885±0.008 | 0.805±0.014 | 0.602±0.027 | 0.875±0.002 | 0.806±0.008 | 0.597±0.013 | 0.829±0.011 | 0.727±0.017 | 0.473±0.015 |
| hERG Blockers        | Test set       | 0.937±0.006 | 0.828±0.017 | 0.680±0.026 | 0.933±0.003 | 0.863±0.008 | 0.729±0.017 | 0.934±0.005 | 0.866±0.005 | 0.732±0.010 |
|                      | Validation set | 0.937±0.006 | 0.829±0.017 | 0.682±0.028 | 0.934±0.004 | 0.865±0.008 | 0.733±0.015 | 0.935±0.011 | 0.871±0.012 | 0.743±0.025 |
| Human Hepatotoxicity | Test set       | 0.811±0.047 | 0.729±0.039 | 0.452±0.081 | 0.822±0.015 | 0.723±0.019 | 0.441±0.042 | 0.755±0.046 | 0.690±0.049 | 0.379±0.102 |
|                      | Validation set | 0.794±0.018 | 0.712±0.023 | 0.413±0.047 | 0.811±0.032 | 0.720±0.033 | 0.428±0.070 | 0.765±0.027 | 0.691±0.040 | 0.383±0.075 |
| DILI                 | Test set       | 0.860±0.052 | 0.787±0.075 | 0.590±0.143 | 0.902±0.037 | 0.826±0.027 | 0.658±0.050 | 0.891±0.030 | 0.804±0.015 | 0.625±0.022 |
|                      | Validation set | 0.899±0.039 | 0.825±0.052 | 0.667±0.094 | 0.895±0.052 | 0.792±0.056 | 0.597±0.113 | 0.900±0.034 | 0.821±0.067 | 0.650±0.126 |
| AMES Mutagenicity    | Test set       | 0.882±0.007 | 0.785±0.015 | 0.576±0.028 | 0.874±0.009 | 0.778±0.002 | 0.563±0.009 | 0.888±0.011 | 0.812±0.015 | 0.620±0.031 |
|                      | Validation set | 0.893±0.010 | 0.796±0.015 | 0.595±0.028 | 0.879±0.012 | 0.780±0.008 | 0.566±0.018 | 0.888±0.014 | 0.807±0.016 | 0.611±0.033 |
| ROA                  | Test set       | 0.865±0.011 | 0.761±0.022 | 0.534±0.036 | 0.846±0.010 | 0.761±0.011 | 0.515±0.024 | 0.852±0.014 | 0.777±0.023 | 0.543±0.045 |
|                      | Validation set | 0.842±0.014 | 0.746±0.025 | 0.508±0.037 | 0.836±0.011 | 0.755±0.011 | 0.505±0.021 | 0.855±0.013 | 0.779±0.022 | 0.541±0.041 |
| FDAMDD               | Test set       | 0.862±0.031 | 0.778±0.031 | 0.572±0.053 | 0.861±0.036 | 0.783±0.034 | 0.574±0.073 | 0.843±0.051 | 0.753±0.067 | 0.513±0.128 |
|                      | Validation set | 0.788±0.032 | 0.702±0.040 | 0.426±0.074 | 0.772±0.027 | 0.710±0.030 | 0.434±0.060 | 0.818±0.038 | 0.757±0.033 | 0.527±0.058 |
| Skin Sensitization   | Test set       | 0.787±0.043 | 0.780±0.062 | 0.491±0.152 | 0.768±0.072 | 0.745±0.024 | 0.365±0.072 | 0.759±0.066 | 0.725±0.040 | 0.419±0.082 |
|                      | Validation set | 0.831±0.067 | 0.781±0.035 | 0.497±0.083 | 0.801±0.120 | 0.762±0.096 | 0.427±0.258 | 0.764±0.074 | 0.681±0.090 | 0.340±0.184 |
| Carcinogenicity      | Test set       | 0.715±0.029 | 0.668±0.040 | 0.349±0.078 | 0.729±0.044 | 0.633±0.037 | 0.296±0.072 | 0.702±0.038 | 0.637±0.022 | 0.277±0.047 |
|                      | Validation set | 0.745±0.029 | 0.662±0.028 | 0.342±0.059 | 0.752±0.029 | 0.647±0.049 | 0.324±0.103 | 0.742±0.048 | 0.670±0.052 | 0.342±0.104 |
| Eye Corrosion        | Test set       | 0.993±0.003 | 0.971±0.006 | 0.940±0.012 | 0.990±0.004 | 0.948±0.005 | 0.896±0.012 | 0.991±0.005 | 0.957±0.009 | 0.911±0.017 |
|                      | Validation set | 0.996±0.002 | 0.968±0.010 | 0.934±0.021 | 0.992±0.002 | 0.961±0.006 | 0.922±0.012 | 0.988±0.003 | 0.953±0.016 | 0.902±0.032 |
| Eye Irritation       | Test set       | 0.980±0.003 | 0.948±0.007 | 0.864±0.020 | 0.974±0.004 | 0.918±0.016 | 0.780±0.044 | 0.977±0.008 | 0.943±0.011 | 0.854±0.024 |
|                      | Validation set | 0.973±0.005 | 0.946±0.007 | 0.857±0.018 | 0.967±0.006 | 0.919±0.006 | 0.784±0.017 | 0.981±0.007 | 0.944±0.011 | 0.861±0.024 |
| Respiratory          | Test set       | 0.867±0.04  | 0.775±0.042 | 0.524±0.091 | 0.836±0.024 | 0.761±0.021 | 0.493±0.047 | 0.874±0.019 | 0.793±0.012 | 0.573±0.031 |
|                      | Validation set | 0.861±0.023 | 0.783±0.019 | 0.541±0.041 | 0.858±0.017 | 0.769±0.029 | 0.512±0.063 | 0.881±0.025 | 0.794±0.039 | 0.586±0.069 |

|                             |                |             |             |             |             |             |             |             |             |             |
|-----------------------------|----------------|-------------|-------------|-------------|-------------|-------------|-------------|-------------|-------------|-------------|
| A549 Cytotoxicity           | Test set       | 0.820±0.017 | 0.905±0.007 | 0.351±0.043 | 0.795±0.032 | 0.920±0.006 | 0.314±0.067 | 0.846±0.028 | 0.800±0.025 | 0.352±0.044 |
|                             | Validation set | 0.863±0.029 | 0.904±0.011 | 0.383±0.058 | 0.846±0.017 | 0.927±0.007 | 0.449±0.070 | 0.853±0.028 | 0.802±0.037 | 0.354±0.038 |
| hERG Blocker (10um)         | Test set       | 0.840±0.017 | 0.691±0.023 | 0.426±0.035 | 0.828±0.009 | 0.699±0.009 | 0.429±0.013 | 0.844±0.014 | 0.767±0.015 | 0.535±0.030 |
|                             | Validation set | 0.844±0.012 | 0.698±0.029 | 0.448±0.046 | 0.833±0.012 | 0.704±0.014 | 0.449±0.027 | 0.839±0.009 | 0.758±0.012 | 0.516±0.025 |
| Hek293 Cytotoxicity         | Test set       | 0.848±0.017 | 0.832±0.005 | 0.535±0.025 | 0.831±0.013 | 0.839±0.009 | 0.497±0.016 | 0.856±0.021 | 0.787±0.025 | 0.498±0.043 |
|                             | Validation set | 0.837±0.023 | 0.818±0.014 | 0.503±0.045 | 0.825±0.027 | 0.833±0.013 | 0.465±0.040 | 0.866±0.022 | 0.793±0.027 | 0.511±0.040 |
| Hematotoxicity              | Test set       | 0.819±0.022 | 0.754±0.024 | 0.463±0.046 | 0.824±0.032 | 0.755±0.048 | 0.468±0.088 | 0.771±0.021 | 0.692±0.034 | 0.355±0.038 |
|                             | Validation set | 0.825±0.015 | 0.749±0.016 | 0.445±0.031 | 0.828±0.028 | 0.763±0.020 | 0.474±0.047 | 0.794±0.045 | 0.724±0.049 | 0.412±0.088 |
| Genotoxicity                | Test set       | 0.941±0.033 | 0.908±0.043 | 0.814±0.085 | 0.933±0.027 | 0.889±0.039 | 0.781±0.070 | 0.925±0.039 | 0.841±0.049 | 0.676±0.109 |
|                             | Validation set | 0.961±0.027 | 0.888±0.037 | 0.774±0.078 | 0.945±0.027 | 0.876±0.029 | 0.748±0.067 | 0.953±0.029 | 0.870±0.038 | 0.741±0.076 |
| Drug-induced Nephrotoxicity | Test set       | 0.850±0.034 | 0.735±0.027 | 0.481±0.045 | 0.813±0.056 | 0.756±0.077 | 0.519±0.153 | 0.752±0.055 | 0.680±0.056 | 0.365±0.111 |
|                             | Validation set | 0.785±0.046 | 0.729±0.030 | 0.471±0.065 | 0.788±0.077 | 0.719±0.057 | 0.445±0.111 | 0.807±0.047 | 0.736±0.039 | 0.478±0.080 |
| Drug-induced Neurotoxicity  | Test set       | 0.804±0.044 | 0.701±0.051 | 0.417±0.109 | 0.808±0.047 | 0.731±0.060 | 0.484±0.108 | 0.823±0.031 | 0.725±0.052 | 0.456±0.097 |
|                             | Validation set | 0.784±0.048 | 0.694±0.058 | 0.399±0.120 | 0.820±0.030 | 0.720±0.039 | 0.458±0.083 | 0.820±0.081 | 0.749±0.063 | 0.500±0.127 |
| Ototoxicity                 | Test set       | 0.776±0.017 | 0.669±0.049 | 0.361±0.058 | 0.786±0.011 | 0.720±0.013 | 0.411±0.020 | 0.759±0.010 | 0.733±0.016 | 0.434±0.034 |
|                             | Validation set | 0.786±0.012 | 0.692±0.035 | 0.406±0.053 | 0.791±0.027 | 0.738±0.028 | 0.450±0.059 | 0.790±0.027 | 0.744±0.025 | 0.458±0.062 |
| RPMI-8226 Immunotoxicity    | Test set       | 0.878±0.008 | 0.927±0.005 | 0.478±0.025 | 0.866±0.006 | 0.929±0.002 | 0.401±0.006 | 0.880±0.004 | 0.827±0.017 | 0.405±0.019 |
|                             | Validation set | 0.881±0.005 | 0.930±0.003 | 0.500±0.009 | 0.874±0.008 | 0.930±0.003 | 0.419±0.028 | 0.888±0.009 | 0.824±0.020 | 0.415±0.022 |
| NR-AR                       | Test set       | 0.883±0.016 | 0.956±0.016 | 0.534±0.076 | 0.839±0.021 | 0.962±0.008 | 0.520±0.078 | 0.840±0.026 | 0.880±0.022 | 0.314±0.024 |
|                             | Validation set | 0.904±0.026 | 0.955±0.012 | 0.531±0.057 | 0.886±0.032 | 0.959±0.010 | 0.548±0.076 | 0.893±0.068 | 0.885±0.028 | 0.372±0.082 |
| NR-AR-LBD                   | Test set       | 0.959±0.026 | 0.973±0.005 | 0.667±0.049 | 0.933±0.027 | 0.968±0.009 | 0.621±0.081 | 0.912±0.021 | 0.929±0.017 | 0.452±0.048 |
|                             | Validation set | 0.969±0.025 | 0.972±0.006 | 0.666±0.083 | 0.959±0.019 | 0.972±0.005 | 0.676±0.050 | 0.950±0.040 | 0.931±0.020 | 0.508±0.090 |
| NR-AhR                      | Test set       | 0.924±0.011 | 0.862±0.040 | 0.550±0.047 | 0.894±0.023 | 0.898±0.009 | 0.558±0.023 | 0.909±0.021 | 0.837±0.012 | 0.500±0.027 |
|                             | Validation set | 0.938±0.015 | 0.872±0.027 | 0.571±0.024 | 0.927±0.012 | 0.904±0.019 | 0.608±0.058 | 0.930±0.023 | 0.847±0.021 | 0.537±0.048 |
| NR-Aromatase                | Test set       | 0.895±0.019 | 0.902±0.030 | 0.347±0.044 | 0.831±0.030 | 0.934±0.009 | 0.358±0.035 | 0.861±0.040 | 0.832±0.012 | 0.288±0.024 |
|                             | Validation set | 0.893±0.014 | 0.903±0.021 | 0.362±0.023 | 0.848±0.028 | 0.937±0.017 | 0.401±0.062 | 0.904±0.053 | 0.842±0.019 | 0.346±0.073 |
| NR-ER                       | Test set       | 0.812±0.034 | 0.797±0.081 | 0.373±0.076 | 0.784±0.036 | 0.853±0.019 | 0.392±0.023 | 0.770±0.058 | 0.800±0.016 | 0.327±0.031 |
|                             | Validation set | 0.806±0.033 | 0.805±0.046 | 0.363±0.039 | 0.773±0.021 | 0.841±0.034 | 0.355±0.042 | 0.817±0.065 | 0.822±0.023 | 0.388±0.068 |
| NR-ER-LBD                   | Test set       | 0.904±0.019 | 0.930±0.019 | 0.482±0.058 | 0.896±0.025 | 0.942±0.011 | 0.492±0.041 | 0.853±0.052 | 0.862±0.021 | 0.343±0.061 |
|                             | Validation set | 0.919±0.013 | 0.933±0.020 | 0.503±0.073 | 0.911±0.019 | 0.951±0.012 | 0.548±0.064 | 0.894±0.069 | 0.868±0.025 | 0.397±0.083 |
| NR-PPAR-gamma               | Test set       | 0.913±0.035 | 0.940±0.019 | 0.424±0.064 | 0.874±0.039 | 0.957±0.003 | 0.422±0.062 | 0.873±0.054 | 0.891±0.013 | 0.301±0.054 |
|                             | Validation set | 0.903±0.024 | 0.947±0.024 | 0.473±0.081 | 0.887±0.037 | 0.951±0.008 | 0.391±0.083 | 0.907±0.066 | 0.894±0.013 | 0.354±0.082 |
| SR-ARE                      | Test set       | 0.854±0.016 | 0.774±0.060 | 0.448±0.058 | 0.819±0.026 | 0.824±0.009 | 0.443±0.048 | 0.837±0.008 | 0.780±0.015 | 0.412±0.032 |
|                             | Validation set | 0.880±0.016 | 0.780±0.059 | 0.481±0.050 | 0.839±0.026 | 0.819±0.009 | 0.454±0.045 | 0.870±0.040 | 0.794±0.025 | 0.465±0.065 |
| SR-ATAD5                    | Test set       | 0.940±0.030 | 0.942±0.019 | 0.494±0.085 | 0.926±0.030 | 0.963±0.009 | 0.525±0.096 | 0.901±0.040 | 0.869±0.032 | 0.324±0.092 |
|                             | Validation set | 0.947±0.009 | 0.943±0.008 | 0.506±0.037 | 0.929±0.035 | 0.962±0.005 | 0.535±0.053 | 0.929±0.047 | 0.870±0.026 | 0.368±0.077 |
| SR-HSE                      | Test set       | 0.860±0.020 | 0.899±0.026 | 0.417±0.044 | 0.814±0.040 | 0.909±0.018 | 0.359±0.050 | 0.836±0.032 | 0.830±0.029 | 0.303±0.046 |
|                             | Validation set | 0.869±0.039 | 0.895±0.045 | 0.412±0.071 | 0.829±0.046 | 0.915±0.031 | 0.399±0.061 | 0.881±0.068 | 0.852±0.029 | 0.378±0.094 |
| SR-MMP                      | Test set       | 0.941±0.016 | 0.857±0.048 | 0.604±0.062 | 0.911±0.017 | 0.881±0.021 | 0.610±0.045 | 0.915±0.013 | 0.850±0.023 | 0.572±0.046 |
|                             | Validation set | 0.935±0.008 | 0.859±0.043 | 0.615±0.063 | 0.919±0.008 | 0.880±0.020 | 0.613±0.031 | 0.933±0.022 | 0.863±0.022 | 0.606±0.052 |



|        |                |             |             |             |             |             |             |             |             |             |
|--------|----------------|-------------|-------------|-------------|-------------|-------------|-------------|-------------|-------------|-------------|
| SR-p53 | Test set       | 0.890±0.027 | 0.882±0.034 | 0.415±0.036 | 0.870±0.027 | 0.914±0.010 | 0.445±0.022 | 0.854±0.016 | 0.813±0.032 | 0.339±0.031 |
|        | Validation set | 0.905±0.021 | 0.885±0.044 | 0.489±0.056 | 0.884±0.012 | 0.917±0.012 | 0.486±0.042 | 0.898±0.049 | 0.823±0.031 | 0.392±0.074 |

Supplementary Table 6. Regression model error at various uncertainty threshold

| Dataset             | DMPNN-Des              |                  | DMPNN                 |                  |
|---------------------|------------------------|------------------|-----------------------|------------------|
|                     | Uncertainty Interval   | RMSE Interval    | Uncertainty Interval  | RMSE Interval    |
| logS                | [0,00000, 0.05255]     | [0,000, 0.455]   | [0,00000, 0.02043]    | [0,000, 0.396]   |
|                     | (0.05255, 0.07554)     | (0.455, 0.502)   | (0.02043, 0.02895)    | (0.396, 0.475)   |
|                     | (0.07554, 0.11779)     | (0.502, 0.605)   | (0.02895, 0.04577)    | (0.475, 0.581)   |
| logD7.4             | [0,00000, 0.03084]     | [0,000, 0.308]   | [0,00000, 0.01615]    | [0,000, 0.291]   |
|                     | (0.03084, 0.03940)     | (0.308, 0.326)   | (0.01615, 0.02035)    | (0.291, 0.323)   |
|                     | (0.03940, 0.05330)     | (0.326, 0.348)   | (0.02035, 0.02746)    | (0.323, 0.348)   |
| logP                | [0,00000, 0.01940]     | [0,000, 0.235]   | [0,00000, 0.00929]    | [0,000, 0.209]   |
|                     | (0.01940, 0.02572)     | (0.235, 0.260)   | (0.00929, 0.01244)    | (0.209, 0.234)   |
|                     | (0.02572, 0.03713)     | (0.260, 0.282)   | (0.01244, 0.01834)    | (0.234, 0.261)   |
| melting point       | [0,00000, 172.21813]   | [0,000, 27.034]  | [0,00000, 73.31254]   | [0,000, 27.048]  |
|                     | (172.21813, 224.61369) | (27.034, 29.597) | (73.31254, 98.17039)  | (27.048, 30.403) |
|                     | (224.61369, 315.17204) | (29.597, 32.751) | (98.17039, 140.63725) | (30.403, 31.989) |
| boiling point       | [0,00000, 58.04890]    | [0,000, 7.667]   | [0,00000, 27.80054]   | [0,000, 10.998]  |
|                     | (58.04890, 76.09868)   | (7.667, 10.598)  | (27.80054, 36.23693)  | (10.998, 11.454) |
|                     | (76.09868, 111.23996)  | (10.598, 12.481) | (36.23693, 50.53419)  | (11.454, 13.300) |
| pKa (acidic)        | [0,00000, 0.08959]     | [0,000, 0.394]   | [0,00000, 0.02547]    | [0,000, 0.230]   |
|                     | (0.08959, 0.17127)     | (0.394, 0.452)   | (0.02547, 0.05581)    | (0.230, 0.483)   |
|                     | (0.17127, 0.34059)     | (0.452, 0.773)   | (0.05581, 0.11198)    | (0.483, 0.658)   |
| pKa (basic)         | [0,00000, 0.12694]     | [0,000, 0.427]   | [0,00000, 0.04285]    | [0,000, 0.362]   |
|                     | (0.12694, 0.18051)     | (0.427, 0.574)   | (0.04285, 0.06346)    | (0.362, 0.491)   |
|                     | (0.18051, 0.29106)     | (0.574, 0.686)   | (0.06346, 0.10124)    | (0.491, 0.680)   |
| Caco-2 Permeability | [0,00000, 0.00506]     | [0,000, 0.208]   | [0,00000, 0.00147]    | [0,000, 0.244]   |
|                     | (0.00506, 0.00932)     | (0.208, 0.243)   | (0.00147, 0.00299)    | (0.244, 0.269)   |
|                     | (0.00932, 0.01785)     | (0.243, 0.279)   | (0.00299, 0.00732)    | (0.269, 0.300)   |
| MDCK Permeability   | [0,00000, 0.00350]     | [0,000, 0.187]   | [0,00000, 0.00104]    | [0,000, 0.201]   |
|                     | (0.00350, 0.00561)     | (0.187, 0.204)   | (0.00104, 0.00190)    | (0.201, 0.271)   |
|                     | (0.00561, 0.01024)     | (0.204, 0.251)   | (0.00190, 0.00358)    | (0.271, 0.292)   |
| PPB                 | [0,00000, 0.12481]     | [0,000, 2.336]   | [0,00000, 0.15943]    | [0,000, 5.906]   |
|                     | (0.12481, 0.26645)     | (2.336, 5.600)   | (0.15943, 0.27067)    | (5.906, 5.873)   |
|                     | (0.26645, 1.52185)     | (5.600, 7.412)   | (0.27067, 1.05816)    | (5.873, 7.309)   |
| VDss                | [0,00000, 0.00180]     | [0,000, 0.164]   | [0,00000, 0.00091]    | [0,000, 0.172]   |
|                     | (0.00180, 0.00269)     | (0.164, 0.202)   | (0.00091, 0.00130)    | (0.172, 0.211)   |
|                     | (0.00269, 0.00433)     | (0.202, 0.243)   | (0.00130, 0.00219)    | (0.211, 0.253)   |
| Fu                  | [0,00000, 0.00209]     | [0,000, 0.201]   | [0,00000, 0.00108]    | [0,000, 0.177]   |
|                     | (0.00209, 0.00314)     | (0.201, 0.205)   | (0.00108, 0.00173)    | (0.177, 0.188)   |
|                     | (0.00314, 0.00532)     | (0.205, 0.236)   | (0.00173, 0.00335)    | (0.188, 0.238)   |
| cl-plasma           | [0,00000, 0.08178]     | [0,000, 1.669]   | [0,00000, 0.04806]    | [0,000, 1.251]   |
|                     | (0.08178, 0.16374)     | (1.669, 1.928)   | (0.04806, 0.08851)    | (1.251, 1.617)   |
|                     | (0.16374, 0.36927)     | (1.928, 2.172)   | (0.08851, 0.21065)    | (1.617, 2.610)   |
| t1/2                | [0,00000, 0.00287]     | [0,000, 0.201]   | [0,00000, 0.00139]    | [0,000, 0.180]   |
|                     | (0.00287, 0.00518)     | (0.201, 0.265)   | (0.00139, 0.00234)    | (0.180, 0.275)   |
|                     | (0.00518, 0.01082)     | (0.265, 0.368)   | (0.00234, 0.00577)    | (0.275, 0.342)   |
| BCF                 | [0,00000, 0.00957]     | [0,000, 0.438]   | [0,00000, 0.01057]    | [0,000, 0.745]   |
|                     | (0.00957, 0.01488)     | (0.438, 0.455)   | (0.01057, 0.01911)    | (0.745, 0.662)   |
|                     | (0.01488, 0.02420)     | (0.455, 0.570)   | (0.01911, 0.04322)    | (0.662, 0.691)   |
| IGC50               | [0,00000, 0.00397]     | [0,000, 0.295]   | [0,00000, 0.00366]    | [0,000, 0.283]   |
|                     | (0.00397, 0.00644)     | (0.295, 0.351)   | (0.00366, 0.00614)    | (0.283, 0.285)   |
|                     | (0.00644, 0.01099)     | (0.351, 0.363)   | (0.00614, 0.01303)    | (0.285, 0.339)   |
| LC50FM              | [0,00000, 0.00689]     | [0,000, 0.458]   | [0,00000, 0.00734]    | [0,000, 0.495]   |
|                     | (0.00689, 0.01150)     | (0.458, 0.500)   | (0.00734, 0.01498)    | (0.495, 0.650)   |
|                     | (0.01150, 0.02091)     | (0.500, 0.595)   | (0.01498, 0.03465)    | (0.650, 0.684)   |
| LC50DM              | [0,00000, 0.01234]     | [0,000, 0.573]   | [0,00000, 0.02166]    | [0,000, 0.855]   |
|                     | (0.01234, 0.01882)     | (0.573, 0.512)   | (0.02166, 0.03473)    | (0.855, 0.920)   |
|                     | (0.01882, 0.03202)     | (0.512, 0.674)   | (0.03473, 0.06622)    | (0.920, 0.964)   |

Supplementary Table 7. The optimal uncertainty thresholds determined by maximum Youden's index for various properties in classification model.

| Dataset                     | DMPNN-Des             |                    | DMPNN                 |                    |
|-----------------------------|-----------------------|--------------------|-----------------------|--------------------|
|                             | Uncertainty threshold | Max Youden's index | Uncertainty threshold | Max Youden's index |
| PAMPA                       | 0.00116               | 0.244              | 0.00023               | 0.367              |
| Pgp-inhibitor               | 0.00068               | 0.418              | 0.00049               | 0.518              |
| Pgp-substrate               | 0.00059               | 0.343              | 0.00013               | 0.555              |
| HIA                         | 0.00050               | 0.602              | 0.00001               | 0.496              |
| F20%                        | 0.00075               | 0.485              | 0.00014               | 0.469              |
| F30%                        | 0.00069               | 0.412              | 0.00047               | 0.466              |
| F50%                        | 0.00150               | 0.296              | 0.00025               | 0.455              |
| CYP1A2 inhibitor            | 0.00024               | 0.486              | 0.00060               | 0.556              |
| CYP1A2 substrate            | 0.00091               | 0.380              | 0.00010               | 0.438              |
| CYP2C19 inhibitor           | 0.00030               | 0.428              | 0.00058               | 0.473              |
| CYP2C19 substrate           | 0.00089               | 0.288              | 0.00040               | 0.404              |
| CYP2C9 inhibitor            | 0.00021               | 0.459              | 0.00031               | 0.461              |
| CYP2C9 substrate            | 0.00567               | 0.344              | 0.00024               | 0.319              |
| CYP2D6 inhibitor            | 0.00053               | 0.456              | 0.00057               | 0.525              |
| CYP2D6 substrate            | 0.00263               | 0.282              | 0.00023               | 0.324              |
| CYP3A4 inhibitor            | 0.00027               | 0.458              | 0.00044               | 0.505              |
| CYP3A4 substrate            | 0.00033               | 0.291              | 0.00030               | 0.407              |
| CYP2B6 inhibitor            | 0.00538               | 0.363              | 0.00023               | 0.400              |
| CYP2B6 substrate            | 0.00018               | 0.461              | 0.00057               | 0.660              |
| CYP2C8 inhibitor            | 0.00067               | 0.483              | 0.00031               | 0.552              |
| HLM Stability               | 0.00176               | 0.403              | 0.00045               | 0.335              |
| hERG Blockers               | 0.00027               | 0.521              | 0.00007               | 0.543              |
| hERG Blocker (10um)         | 0.00156               | 0.517              | 0.00042               | 0.600              |
| DILI                        | 0.00008               | 0.669              | 0.00008               | 0.674              |
| AMES Mutagenicity           | 0.00047               | 0.646              | 0.00011               | 0.640              |
| ROA                         | 0.00196               | 0.409              | 0.00024               | 0.316              |
| FDAMDD                      | 0.00025               | 0.662              | 0.00041               | 0.642              |
| Skin Sensitization          | 0.00046               | 0.693              | 0.00019               | 0.712              |
| Carcinogenicity             | 0.00063               | 0.367              | 0.00011               | 0.344              |
| Eye Corrosion               | 0.00029               | 0.729              | 0.00019               | 0.696              |
| Eye Irritation              | 0.00062               | 0.549              | 0.00011               | 0.575              |
| Respiratory                 | 0.00017               | 0.559              | 0.00005               | 0.470              |
| Human Hepatotoxicity        | 0.00024               | 0.608              | 0.00006               | 0.612              |
| Drug-induced Neurotoxicity  | 0.00029               | 0.460              | 0.00028               | 0.484              |
| Ototoxicity                 | 0.00104               | 0.322              | 0.00050               | 0.293              |
| Hematotoxicity              | 0.00185               | 0.478              | 0.00049               | 0.430              |
| Drug-induced Nephrotoxicity | 0.00075               | 0.375              | 0.00036               | 0.366              |
| Genotoxicity                | 0.00147               | 0.369              | 0.00033               | 0.338              |
| RPMI-8226 Immunitoxicity    | 0.00044               | 0.327              | 0.00039               | 0.286              |
| A549 Cytotoxicity           | 0.00359               | 0.328              | 0.00020               | 0.370              |
| Hek293 Cytotoxicity         | 0.00080               | 0.206              | 0.00033               | 0.194              |
| NR-AhR                      | 0.00007               | 0.656              | 0.00016               | 0.691              |
| NR-AR                       | 0.00003               | 0.590              | 0.00029               | 0.653              |
| NR-AR-LBD                   | 0.00268               | 0.337              | 0.00031               | 0.396              |
| NR-Aromatase                | 0.00255               | 0.262              | 0.00046               | 0.242              |
| NR-ER                       | 0.00402               | 0.288              | 0.00088               | 0.351              |
| NR-ER-LBD                   | 0.00200               | 0.300              | 0.00037               | 0.227              |
| NR-PPAR-gamma               | 0.00115               | 0.376              | 0.00044               | 0.351              |
| SR-ARE                      | 0.00074               | 0.263              | 0.00034               | 0.225              |
| SR-ATAD5                    | 0.00005               | 0.538              | 0.00046               | 0.633              |
| SR-HSE                      | 0.00043               | 0.567              | 0.00056               | 0.589              |
| SR-MMP                      | 0.00080               | 0.542              | 0.00056               | 0.607              |
| SR-p53                      | 0.00135               | 0.417              | 0.00045               | 0.443              |

Supplementary Table 8. Runtime analysis in seconds for submissions of 1 to 1000 molecules for ADMETlab 2.0 and ADMETlab 3.0 with different modelling options.

| Number of molecules | ADMETlab2.0 | ADMETlab3.0 (web portal) | ADMETlab3.0 (DMPNN-Des) | ADMETlab3.0 (DMPNN-Des & Uncertainty) | ADMETlab3.0 (DMPNN) | ADMETlab3.0 (DMPNN & Uncertainty) |
|---------------------|-------------|--------------------------|-------------------------|---------------------------------------|---------------------|-----------------------------------|
| 1                   | 4.63        | 5.75                     | 5.80                    | 6.03                                  | 5.79                | 6.09                              |
| 10                  | 5.52        | 6.97                     | 6.89                    | 7.39                                  | 6.63                | 7.34                              |
| 100                 | 12.52       | 13.19                    | 17.21                   | 20.20                                 | 12.93               | 18.18                             |
| 500                 | 39.36       | 43.78                    | 61.23                   | 76.58                                 | 42.10               | 65.60                             |
| 1000                | 84.00       | 87.23                    | 116.59                  | 150.54                                | 77.42               | 130.66                            |

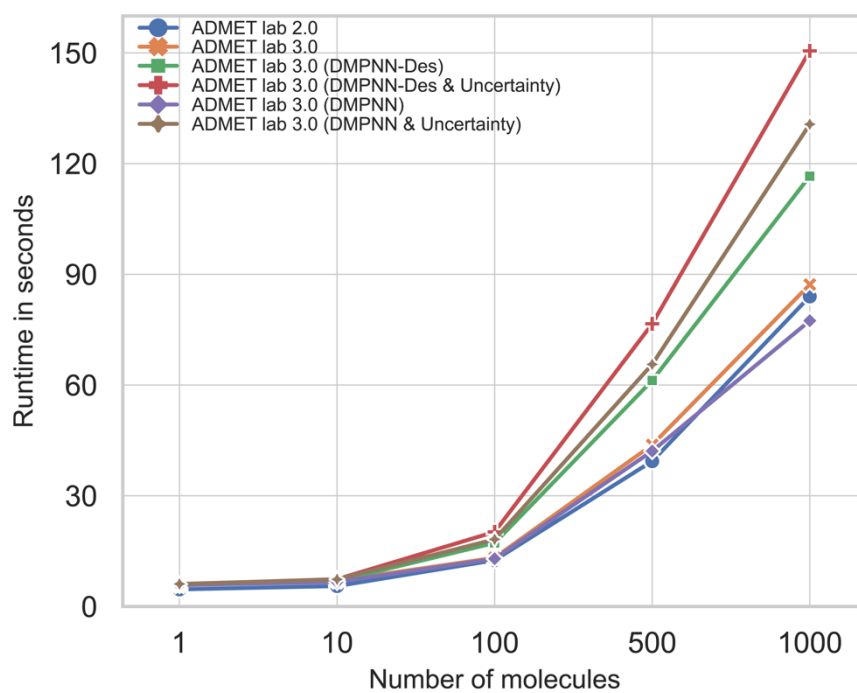

Supplementary Figure 1. Runtime analysis in seconds for submissions of 1 to 1000 molecules for ADMETlab 2.0, ADMETlab 3.0 (DMPNN-Des), ADMETlab 3.0 (DMPNN-Des & Uncertainty), ADMETlab 3.0 (DMPNN), and ADMETlab 3.0 (DMPN & Uncertainty).

## References

1. Yang, K., Swanson, K., Jin, W., Coley, C., Eiden, P., Gao, H., Guzman-Perez, A., Hopper, T., Kelley, B., Mathea, M. *et al.* (2019) Analyzing Learned Molecular Representations for Property Prediction. *J Chem Inf Model*, **59**, 3370-3388.  
<http://www.ncbi.nlm.nih.gov/pubmed/31361484>  
<http://dx.doi.org/10.1021/acs.jcim.9b00237>
2. Heid, E., Greenman, K.P., Chung, Y., Li, S.C., Graff, D.E., Vermeire, F.H., Wu, H., Green, W.H. and McGill, C.J. (2024) Chemprop: A Machine Learning Package for Chemical Property Prediction. *J Chem Inf Model*, **64**, 9-17.  
<http://www.ncbi.nlm.nih.gov/pubmed/38147829>  
<http://dx.doi.org/10.1021/acs.jcim.3c01250>
3. Begoli, E., Bhattacharya, T. and Kusnezov, D. (2019) The need for uncertainty quantification in machine-assisted medical decision making. *Nature Machine Intelligence*, **1**, 20-23.  
<http://dx.doi.org/10.1038/s42256-018-0004-1>
4. Amini, A., Schwarting, W., Soleimany, A. and Rus, D. Deep Evidential Regression. *CoRR*, **abs/1910.02600**.
5. Gal, Y. and Ghahramani, Z. *Dropout as a Bayesian Approximation: Representing Model Uncertainty in Deep Learning*.
6. Wen, M.J. and Tadmor, E.B. (2020) Uncertainty quantification in molecular simulations with dropout neural network potentials. *Npj Comput Mater*, **6**.
7. Tong, X., Wang, D., Ding, X., Tan, X., Ren, Q., Chen, G., Rong, Y., Xu, T., Huang, J., Jiang, H. *et al.* (2022) Blood-brain barrier penetration prediction enhanced by uncertainty estimation. *J Cheminform*, **14**, 44.  
<http://www.ncbi.nlm.nih.gov/pubmed/35799215>  
<http://dx.doi.org/10.1186/s13321-022-00619-2>
8. Wang, S. and Manning, C. (2013) In Sanjoy, D. and David, M. (eds.), *Proceedings of the 30th International Conference on Machine Learning*. PMLR, Proceedings of Machine Learning Research, Vol. 28, pp. 118--126.
9. Dolezal, J.M., Srisuwananukorn, A., Karpeyev, D., Ramesh, S., Kochanny, S., Cody, B., Mansfield, A.S., Rakshit, S., Bansal, R., Bois, M.C. *et al.* (2022) Uncertainty-informed deep learning models enable high-confidence predictions for digital histopathology. *Nat Commun*, **13**, 6572.

<http://www.ncbi.nlm.nih.gov/pubmed/36323656>  
<http://dx.doi.org/10.1038/s41467-022-34025-x>
